# Supplementary material for: Further Evidence of the Melatonin Calmodulin Interaction: Effect on CaMKII Activity
Source: MDPI journal article supplement (doi:10.3390/ijms23052479), 2022-02-24
Supplement: s1 [file s1]

## Supplementary section

### UV-vis measurements set up

We analyzed the interaction between calmodulin (CaM, 4  $\mu\text{M}$ ) and melatonin (MEL, 1.3  $\mu\text{M}$ ) by UV-vis spectroscopy (figure 1s) into an i3 model spectrophotometer (Hanon Instruments Co., Ltd.) before (CaM) and after (CaM-MEL) promoting the coupling reaction.

CaM (120  $\mu\text{M}$ ) [1] and MEL (0.1  $\mu\text{M}$ ) interaction was assessed at different pH values (3.5, 4.5, 6.5 and 7.5), absorbance was measured in the wavelengths range of 250 – 320 nm (figure 2s) into an EnSpire (PerkinElmer) spectrophotometer in 96-well UV plate (Santa Cruz Biotechnology, Inc., sc-213228). The samples were measured by triplicate in independent experiments and measurements performed by spectrophotometers were done at room temperature.

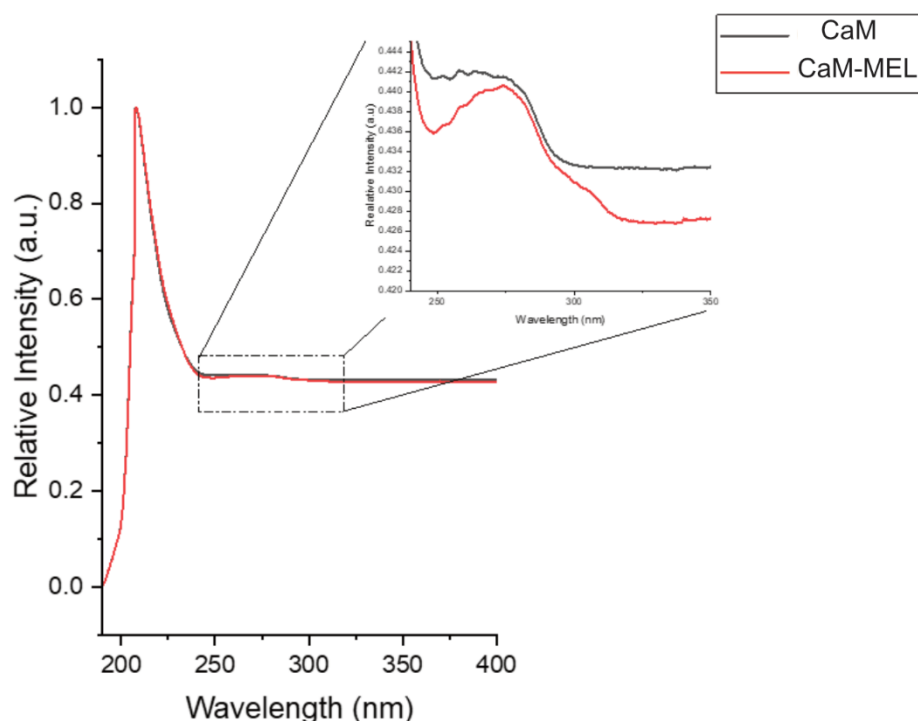

Figure S1. Comparison of the absorbance spectra recorded from calmodulin (CaM, 4  $\mu\text{M}$ , black line) and CaM-melatonin (MEL, 1.3  $\mu\text{M}$ , red line) by UV-vis spectroscopy in buffer Tris 20 mM,  $\text{MgCl}_2$  10 mM,  $\text{CaCl}_2$  (0.1 mM) at pH 7.5. Note that the signals were normalized, and a representative experiment is shown.

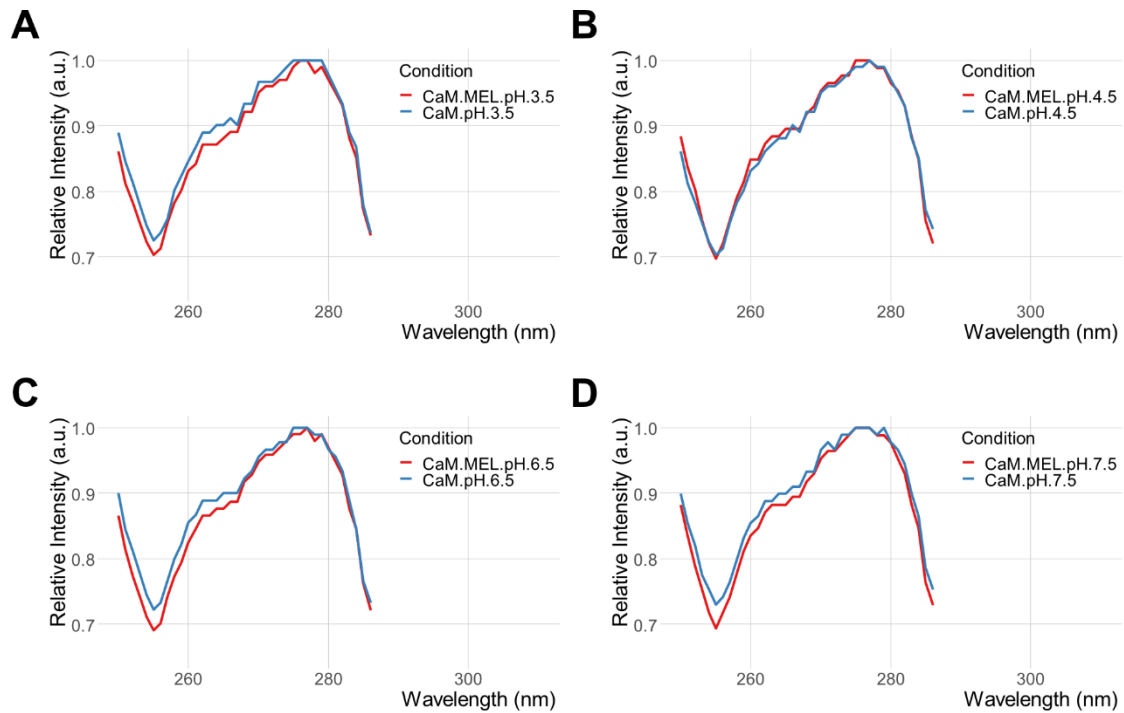

Figure S2. Comparison of the UV-vis absorbance spectra of  $\text{Ca}^{2+}$ -calmodulin and  $\text{Ca}^{2+}$ -calmodulin-melatonin at pH 3.5, 4.5, 6.5 and 7.5. Calmodulin (CaM, 120  $\mu\text{M}$ ) and CaM-melatonin (MEL, 0.1  $\mu\text{M}$ ) were incubated with  $\text{CaCl}_2$  (0.1 mM) in Tris 20 mM and  $\text{MgCl}_2$  10 mM at pH, A) 3.5, B) 4.5, C) 6.5 and D) 7.5 at room temperature. Note that the signals were normalized, and a representative experiment is shown.

## References

1. Stateva, S.R.; Salas, V.; Benaim, G.; Menéndez, M.; Solís, D.; Villalobo, A. Characterization of Phospho-(Tyrosine)-Mimetic Calmodulin Mutants. *PLOS ONE* **2015**, *10*, e0120798, doi:10.1371/JOURNAL.PONE.0120798.
